# The Journal of Neuropsychiatry

## and Clinical Neurosciences

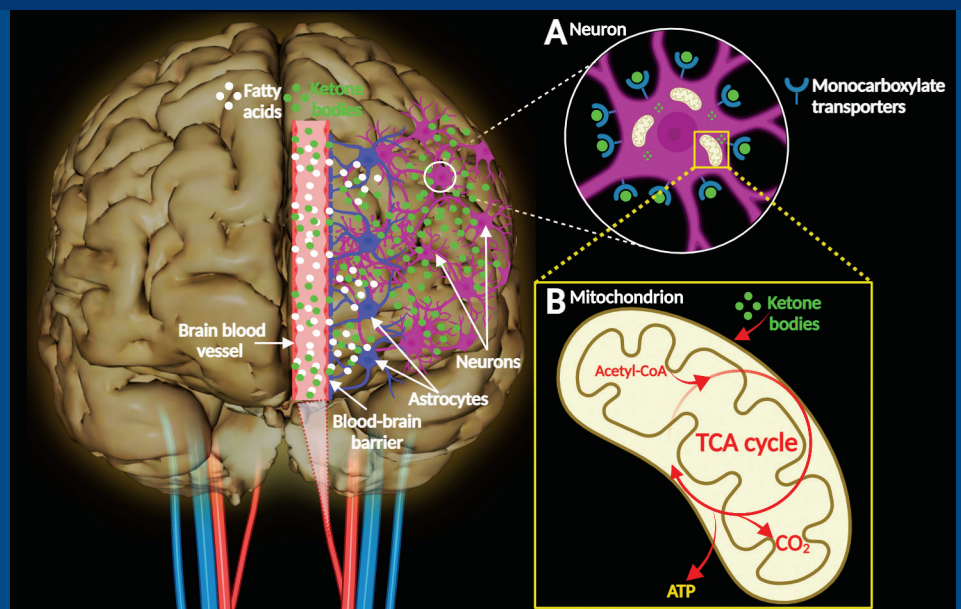

A Systematic Review of Fragile X–Associated  
Neuropsychiatric Disorders

Frequency and Pathophysiology of Apathy in Huntington  
Disease: A Systematic Review and Meta-Analysis

Novel Psychiatric Disorder 6 Months After Traumatic  
Brain Injury in Children and Adolescents

Neuropsychiatric Features of Fregoli Syndrome:  
An Individual Patient Meta-Analysis

Neuroimaging in the Acute Psychiatric Setting:  
Associations With Neuropsychiatric Risk Factors
